# Supplementary material for: Tuning the work functions of graphene quantum dot-modified electrodes for polymer solar cell applications
Source: Royal Society of Chemistry journal article supplement (doi:10.1039/c7nr00136c), 2017-01-01
Supplement: c7nr00136c1.pdf [file c7nr00136c1.pdf]

## Supporting Information

### **Tuning Work Functions of Graphene Quantum Dot- Modified Electrode for Polymer Solar Cells Application**

*Lu Zhang,<sup>†</sup> Zicheng Ding,<sup>†</sup> Ti Tong<sup>‡\*</sup>, Jun Liu<sup>†\*</sup>*

<sup>†</sup>State Key Laboratory of Polymer Physics and Chemistry, Changchun Institute of Applied Chemistry, Chinese Academy of Sciences, Changchun 130022, P. R. China

E-mail: liujun@ciac.ac.cn

<sup>‡</sup>Department of Thoracic Surgery, The Second Hospital of Jilin University, Changchun 130041, P. R. China

E-mail: tti666@163.com

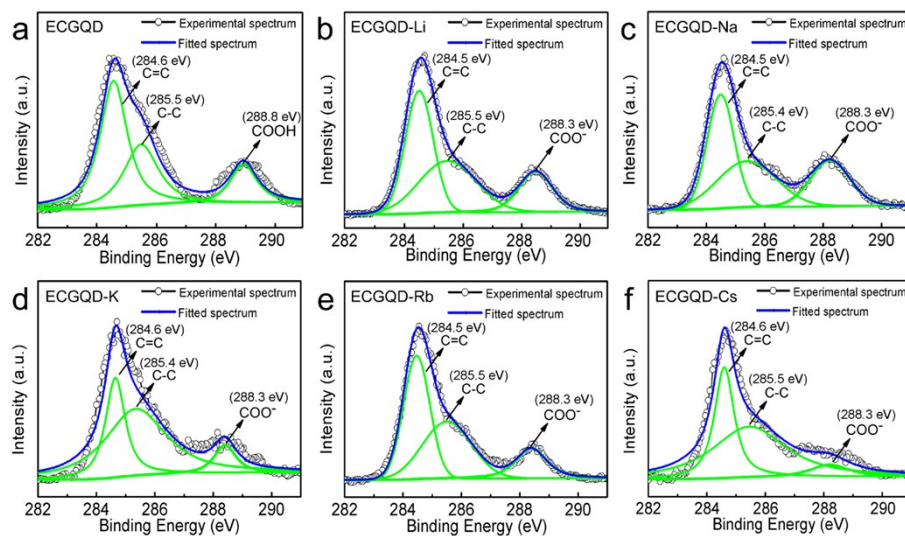

**Fig. S1** XPS C1s spectra of ECGQD and ECGQD-M (M = Li, Na, K, Rb, Cs).

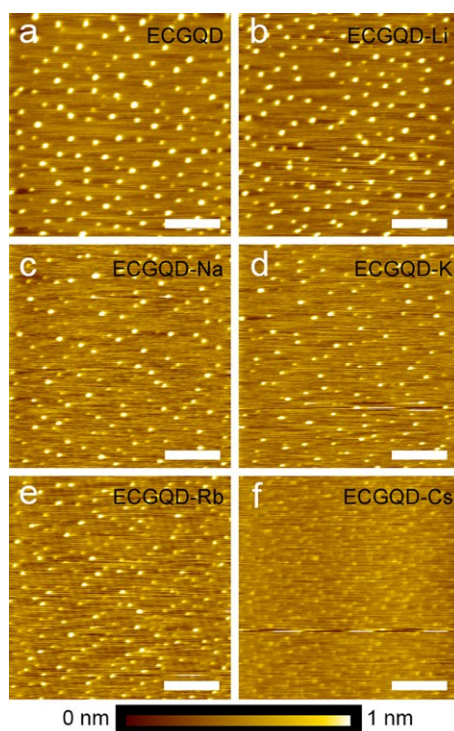

**Fig. S2** AFM images of ECGQD and ECGQD-M (M = Li, Na, K, Rb, Cs) spin-coated on mica substrates. Scale bar is 500 nm.

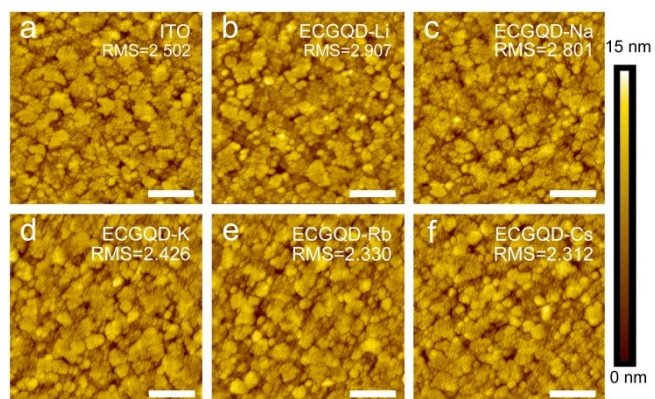

**Fig. S3** AFM height images of ITO substrate and the ITO substrate modified with different CILs. Scale bar is 500 nm.

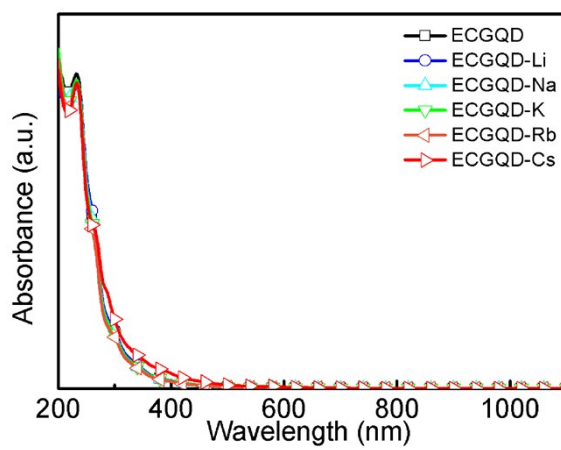

**Fig. S4** UV-Vis absorption spectra of ECGQD and ECGQD-M (M = Li, Na, K, Rb, Cs) in aqueous solution.

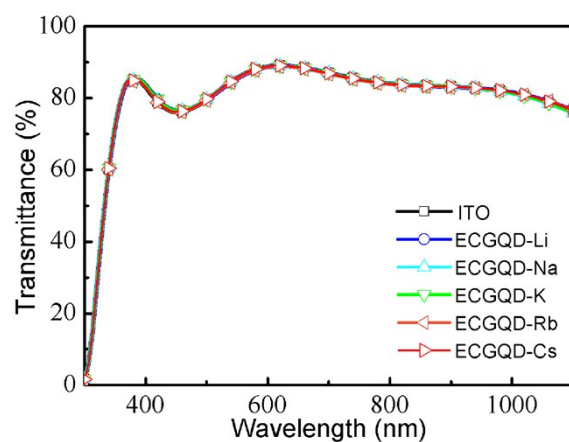

**Fig. S5** Transmittance spectra of the ITO substrate modified with different CILs.

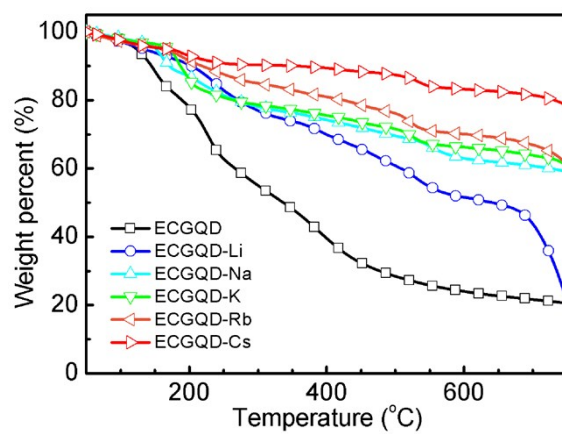

**Fig. S6** TGA curves of ECGQD and ECGQD-M (M = Li, Na, K, Rb, Cs).
